# Supplementary material
Source: ML conference proceedings conference paper supplement (https://openaccess.thecvf.com/content/CVPR2026/html/Zhao_Bias_Is_a_CVPR_2026_paper.html)
Supplement: Supplementary file 1 [file Zhao_Bias_Is_a_CVPR_2026_supplemental.pdf]

# Bias Is a Subspace, Not a Coordinate: A Geometric Rethinking of Post-hoc Debiasing in Vision-Language Models

## Supplementary Material

### 8. Qualitative Results for T2I Generation

Figure 2 presents qualitative examples of text-to-image generation results under the neutral prompt “a person who works as a film director.” The CoDi baseline tends to generate male-presenting images due to training bias, while CoDi + SPD produces more gender-neutral appearances, indicating effective debiasing.

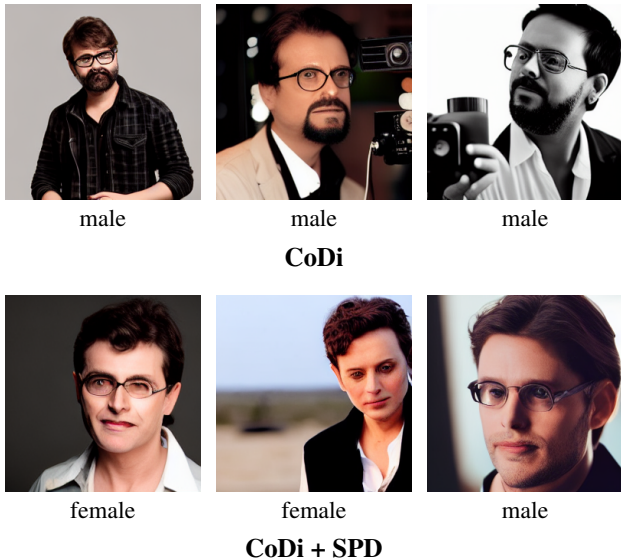

Figure 2. Text-to-image generation results for the neutral prompt “a person who works as a film director.” The first row shows CoDi outputs, and the second row shows CoDi with SPD debiasing. Gender labels (“male” / “female”) are automatically assigned using BLIP-2 by asking “Does the person look like a male or a female?”.

### 9. Impact of $r$ on Downstream Tasks

In SPD, the number of removed bias-predictive directions  $r$  determines a trade-off between debiasing completeness and semantic retention. We first vary  $r$  to study its effect on attribute classification by training linear probes after projection, finding that a moderate projection depth effectively removes target-attribute information while largely preserving semantics. To check whether the optimal setting in downstream tasks aligns with classification, we evaluate text-to-image retrieval on Flickr30K under varying  $r$ . As shown in Tab. 8,  $r = 5$  achieves the best balance between retrieval accuracy (R@K) and fairness (Skew@100), consistent with the choice used across downstream evaluations.

Table 8. Text-to-image retrieval (Flickr30K) results for CLIP (ResNet50) with varying  $r$ .

| Model | Text-to-Image Retrieval |            |            |            |               |
|-------|-------------------------|------------|------------|------------|---------------|
|       | R@1                     | R@5        | R@10       | Skew@100   |               |
| SPD   | $r = 1$                 | 57.11±0.55 | 81.62±0.74 | 88.05±0.58 | 0.1613±0.1025 |
|       | $r = 3$                 | 57.04±0.73 | 81.65±0.62 | 88.09±0.52 | 0.1527±0.0995 |
|       | $r = 5$                 | 56.97±0.57 | 81.42±0.66 | 87.85±0.63 | 0.1177±0.0830 |
|       | $r = 7$                 | 55.47±0.57 | 80.81±0.75 | 87.13±0.51 | 0.1165±0.0971 |
|       | $r = 10$                | 55.32±0.65 | 80.62±0.66 | 86.99±0.55 | 0.1168±0.0851 |

### 10. Computing Resource

Table 9 presents the hardware configuration and runtime of each module used in our experiments. The reported times include Random Forest training for the subsequent projection-direction extraction. Overall, SPD adds limited computational cost during inference while maintaining efficiency across all tested backbones.

Table 9. Compute resources used for experiments.

| Component                       | Details               |
|---------------------------------|-----------------------|
| CPU                             | Intel Xeon Gold 6430  |
| Numbers of CPU cores used       | 32                    |
| GPU                             | NVIDIA RTX A100       |
| Numbers of GPU used             | 4                     |
| (CLIP ViTB-32 Image Encoder)    |                       |
| Training RandomForest           | 310.47s               |
| Direction Extraction            | 37.36s                |
| (CLIP RN50 Image Encoder)       |                       |
| RandomForest Training           | 466.52s               |
| Projection Direction Extraction | 35.37s                |
| (CLIP ViTB-32 Text Encoder)     |                       |
| Training RandomForest           | 1571.34s              |
| Prodection Direction Extraction | 93.77s                |
| (CLIP RN50 Text Encoder)        |                       |
| RandomForest Training           | 2567.06s              |
| Projection Direction Extraction | 146.31s               |
| (CoDi Text Encoder)             |                       |
| Training RandomForest           | 62.71s                |
| Projection Direction Extraction | 3.73s                 |
| (CoDi Image Dncoder)            |                       |
| Training RandomForest           | 197.33s               |
| Projection Direction Extraction | 52.63s                |
| Inference on CoDi with SPD      | 403.62s / 249 prompts |
